# Supplementary material
Source: PubMed Central journal article supplement (PMC5523860)
Supplement: NIHMS875558-supplement-1.pdf [file NIHMS875558-supplement-1.pdf]

# Supplemental Figures

## Figure S1

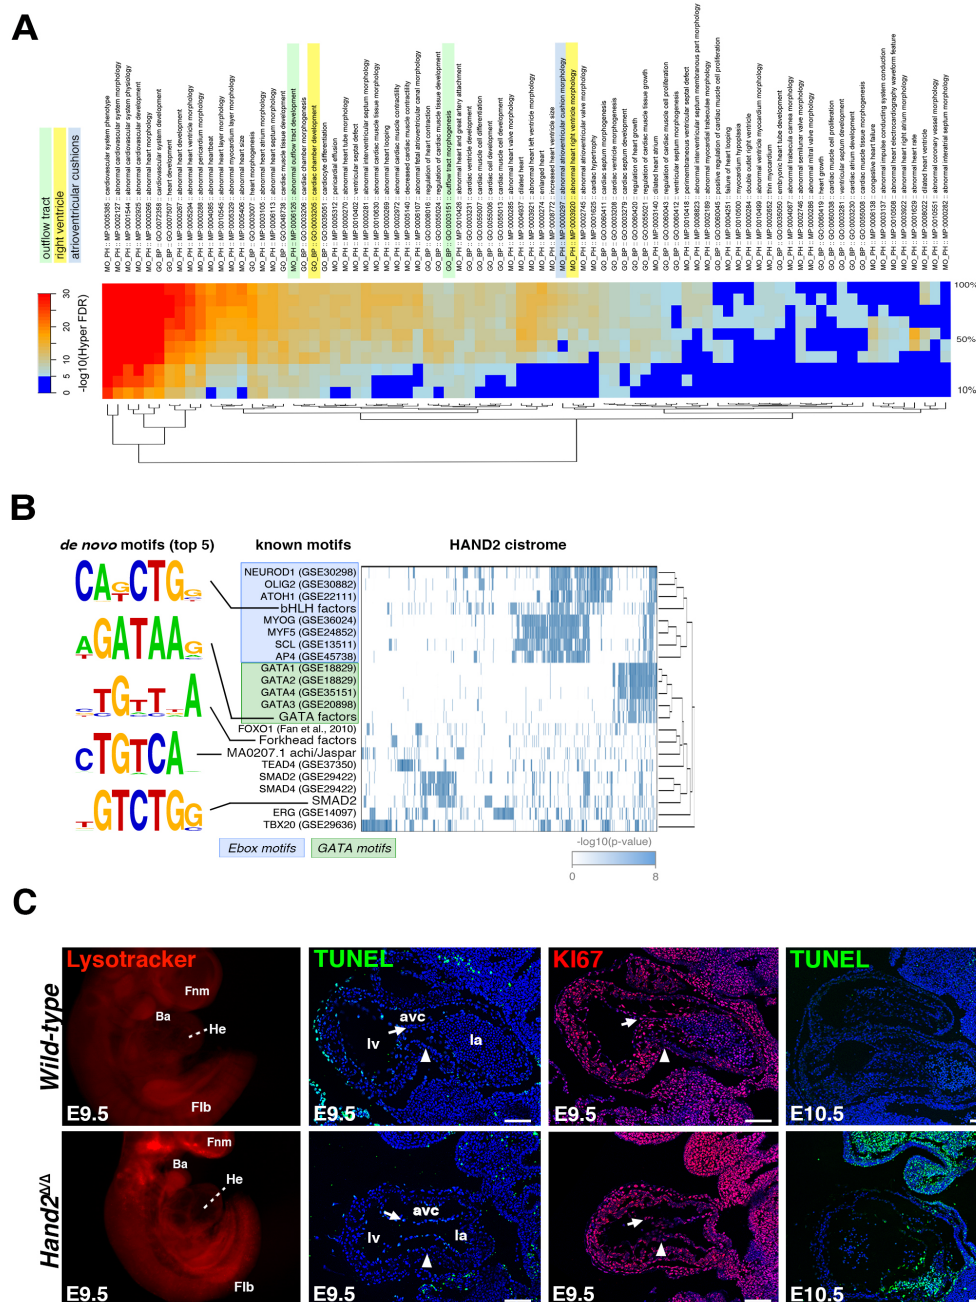

**Figure S1 (related to Figure 1). Analysis of the genomic regions enriched in HAND2 chromatin complexes and associated genes.**

(A) Heat map showing the enrichment of heart-related GO term categories in the list of putative HAND2 target genes defined by GREAT analysis. The columns denote ten incremental bins of HAND2-bound regions (from 10% to the complete set = 100%). For visualization, hyper-geometric p-values equal or lower to  $1e^{-30}$  were set to this value. Terms were hierarchically clustered and re-ordered according to the row-wise mean. GO terms related to the development of specific cardiac compartments are highlighted by different colors: outflow tract (green), right ventricle (yellow) and atrioventricular cushions (blue). While the general cardiac terms are systematically identified in each

incremental bin (top term: cardiovascular system phenotype), GO terms related to more specific aspects of cardiac development (such as: abnormal heart right ventricle morphology) are only detected when considering an increasing number of peaks or the entire dataset. (B) Hierarchical clustering of the high-affinity matches for each of the enriched known motifs across the HAND2-contacted regions is shown. The top five binding motifs that were identified *de novo* are highlighted on the left. (C) Analysis of the patterns of cell death in *Hand2*-deficient mouse embryos. Panel Lysotracker: whole mount Lysotracker staining reveals increased apoptosis in branchial arches (Ba) and frontonasal mass (Fnm) of mutant mouse embryos at E9.5 (red fluorescence), while no aberrant apoptosis is detected in the developing heart. He: heart; Flb: forelimb bud. Panel TUNEL: analysis of serial section by TUNEL staining confirmed that apoptosis is not increased in the mutant heart at E9.5 (TUNEL positive cells fluoresce green). Panel KI67: the majority of all cells are KI67 positive (red fluorescence), which indicates that there is no major effect on cell proliferation in mutant hearts at E9.5. Right-most panel TUNEL: Only by E10.5, the apoptosis is significantly increased in mutant hearts in comparison to wild-type controls. Representative images are shown for all samples analyzed (n=3). avc: atrioventricular canal; lv: left ventricle; la: left atria; oft: outflow tract.

Figure S2

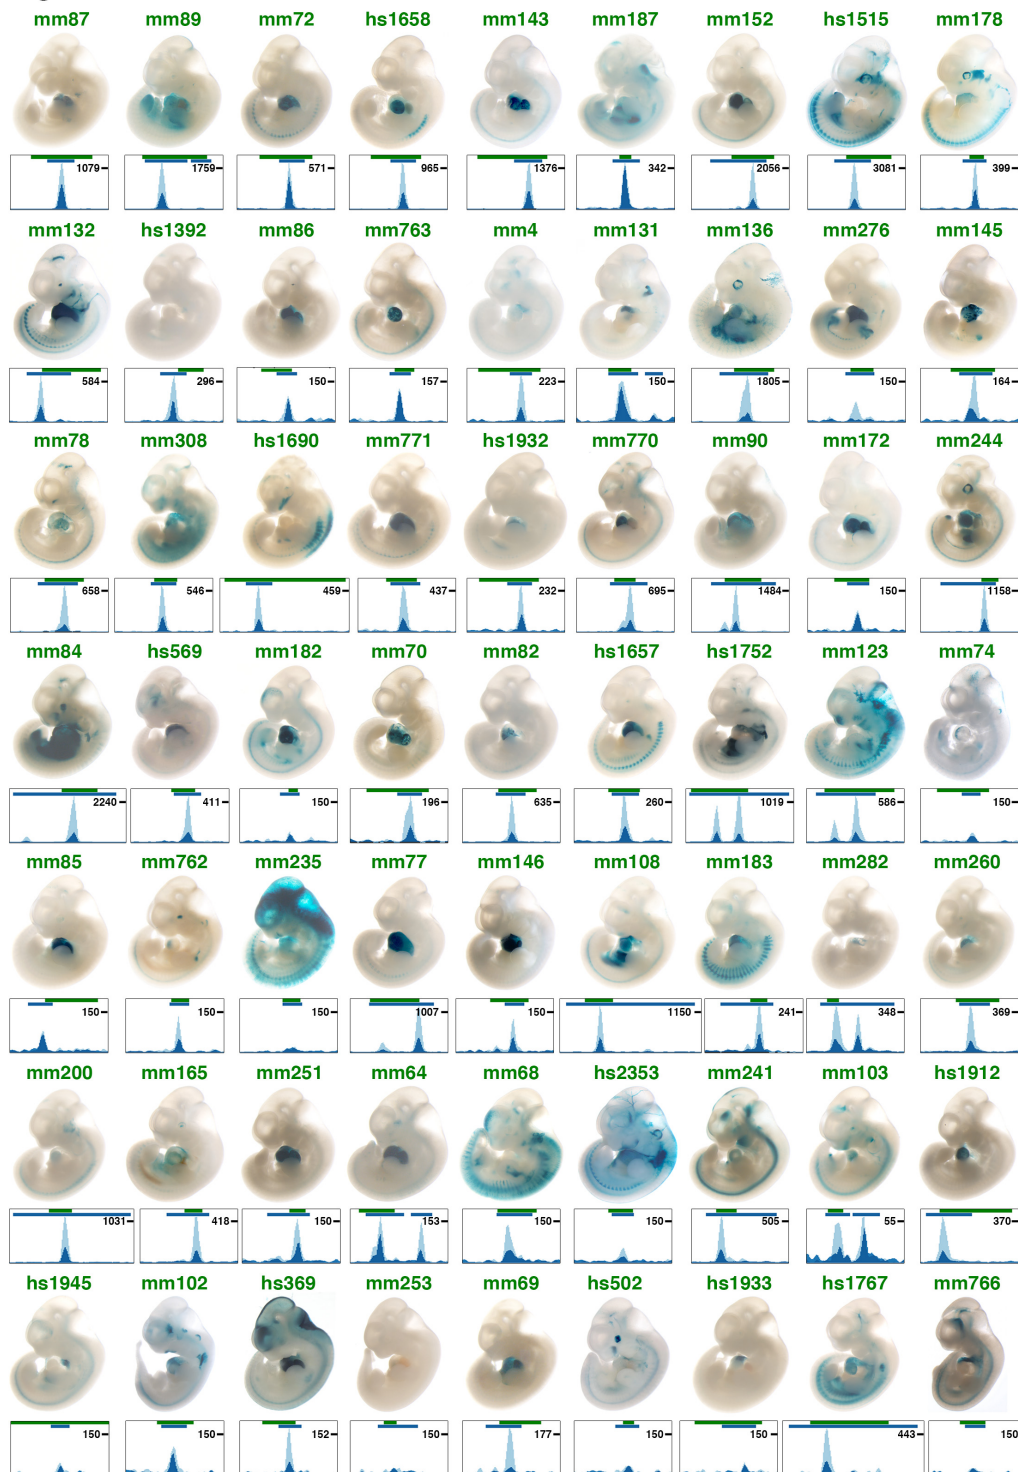

**Figure S2 (related to Figure 1). Activities of the VISTA cardiac enhancers that overlap genomic regions enriched by HAND2 ChIP-Seq (E10.5).**

Representative transgenic founder embryos from the public VISTA enhancer database collection (<https://enhancer.lbl.gov>; Visel et al., 2007) are shown. The transgenic embryos were not generated as part of this study, but images from the database collection were used for the purpose of this analysis. For each VISTA enhancer, the HAND2 ChIP-Seq peak identified by MACS analysis is indicated by a blue bar. The genomic regions used for *LacZ* reporter analysis are indicated by a green bar. mm: mouse element; hs: human element. Nomenclature used is according to the VISTA database.

## Figure S3

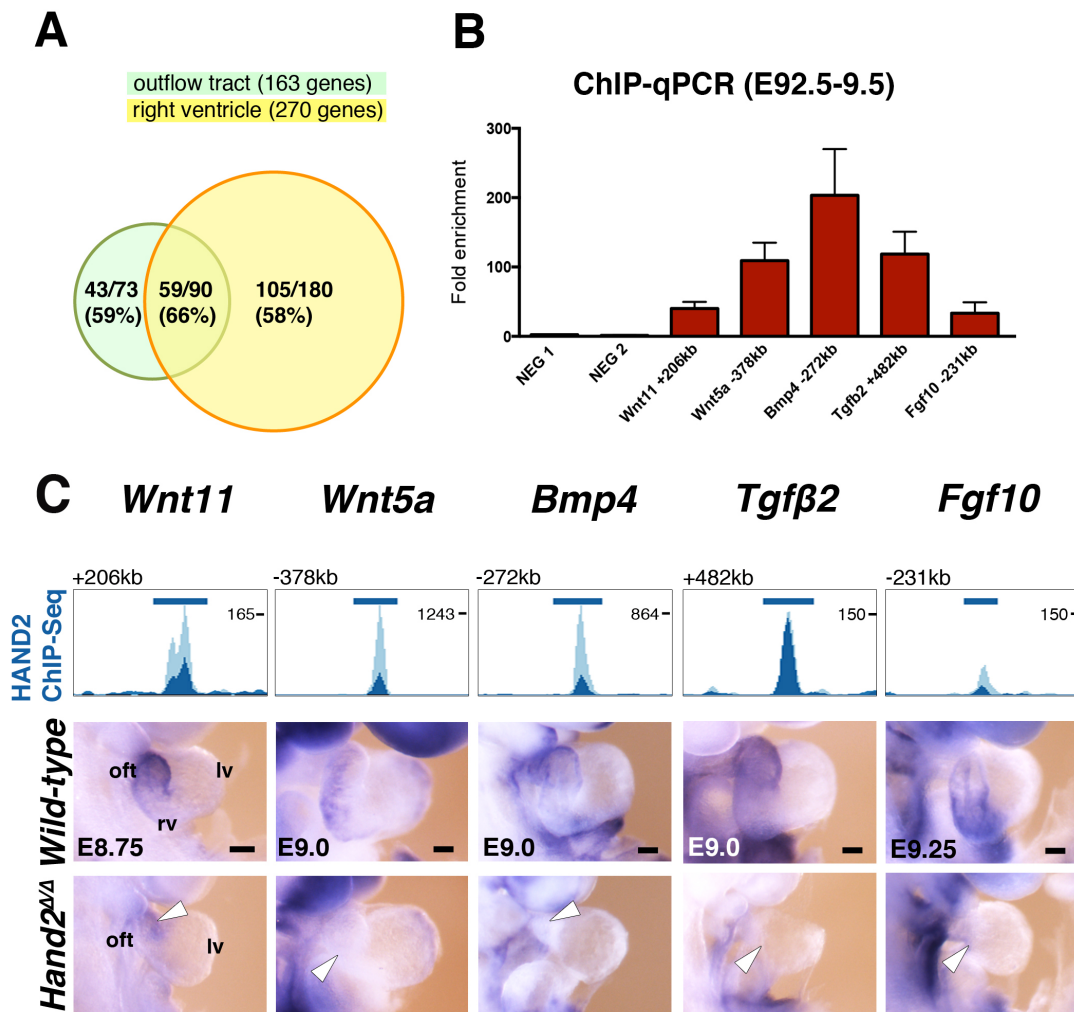

**Figure S3 (related to Figure 1). HAND2 target genes encoding ligands for signaling pathways that function in OFT and/or right ventricle morphogenesis.**

(A) Venn diagram shows the intersection of genes associated with the following mouse phenotype and GO terms, respectively: MP:0006126: abnormal outflow tract development; MP:0003920: abnormal heart right ventricle morphology; GO:0003151: outflow tract morphogenesis; GO:0003205: cardiac chamber development. Numbers and percentages indicate how many of the genomic landscapes associated to the terms encode regions enriched in HAND2 chromatin complexes. (B) ChIP-qPCR validation of HAND2 target regions associated to genes encoding ligands in embryonic hearts at E9.25 (n=2; mean  $\pm$  SD). (C) Comparative WISH analysis of HAND2 target genes encoding signaling ligands in wild-type and *Hand2*-deficient mouse embryos. Graphs show the highest enriched HAND2 ChIP-Seq peaks associated with the genes analyzed. White arrowheads: reduction/loss of expression in *Hand2*-deficient embryos. oft: outflow tract, rv: right ventricle, lv: left ventricle. Scale bar: 100 $\mu$ m.

Figure S4

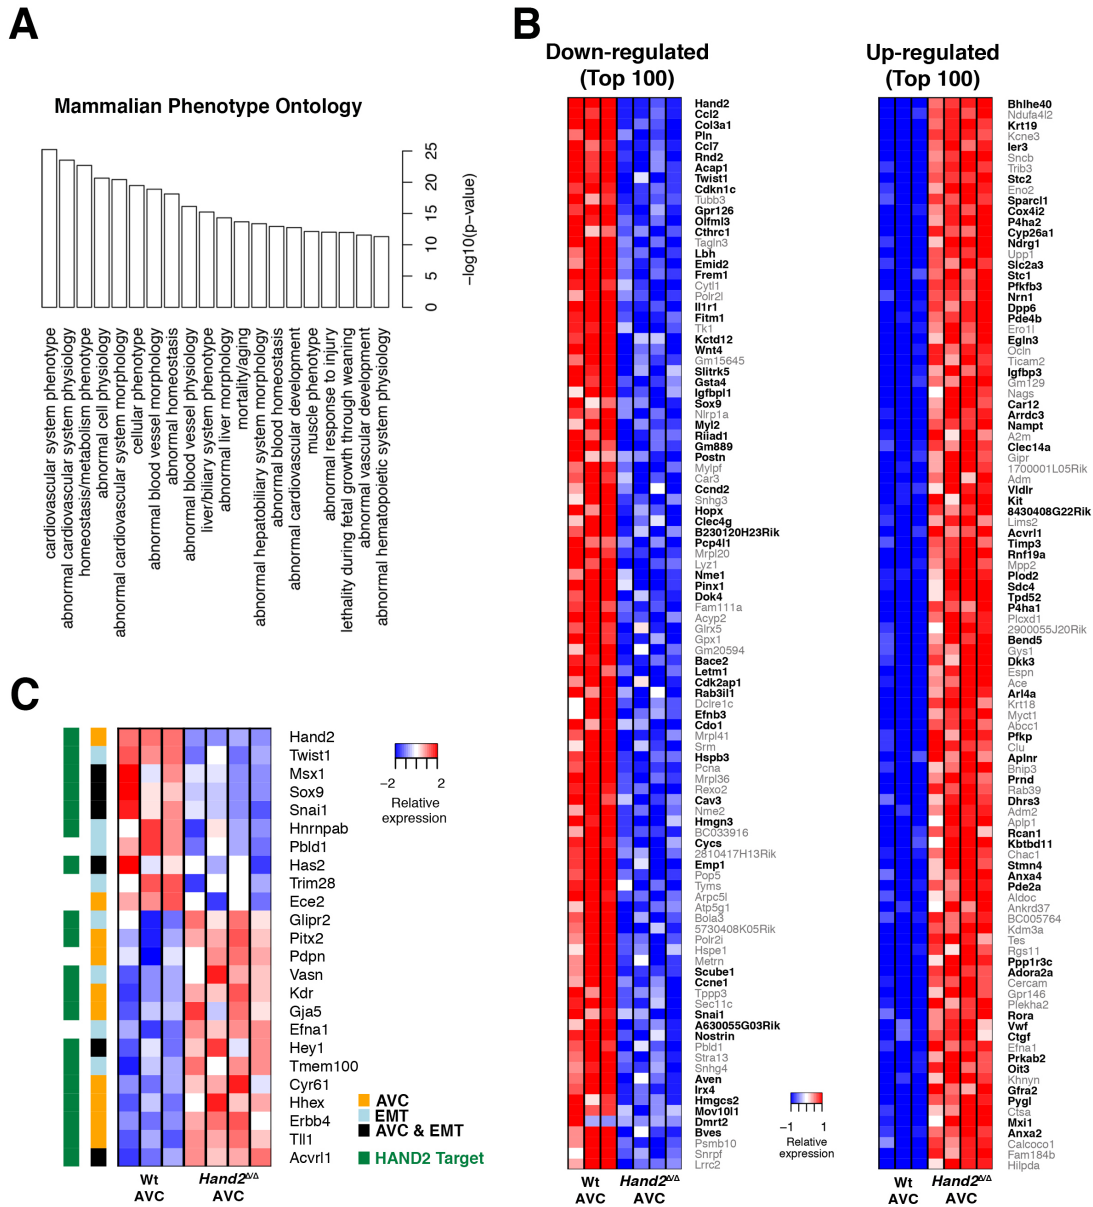

**Figure S4 (related to Figure 4). Transcriptome analysis identifies the HAND2 target genes with significantly altered expression in *Hand2*-deficient AVCs.**

(A) Enrichment analysis for mammalian phenotypes including all 1051 DEGs identified by comparative transcriptome analysis of *Hand2* $\Delta\Delta$  and wild-type AVCs. (B) Top 100 up- and down-regulated genes in *Hand2*-deficient AVCs in comparison to wild-type controls. Genes with regions enriched in HAND2 chromatin complexes within their TADs are indicated in bold black, others in grey. (C) Heat map of up- and down-regulated genes in *Hand2*-deficient AVCs annotated using the following gene ontology categories: MP:0000297 (abnormal AV cushion morphology + child terms) BP:0001837 (epithelial-mesenchymal transition) and BP:0010717 (regulation of EMT). Most of the DEGs in these categories are HAND2 target genes (indicated in green).

## Figure S5

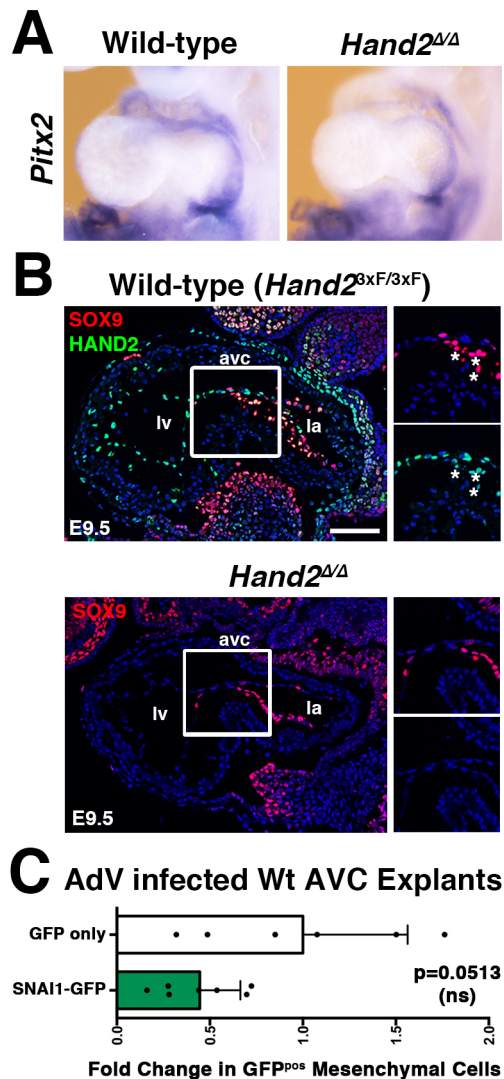

**Figure S5 (related to Figures 5 and 6). Analysis of HAND2 target genes in the developing AVC.**

(A) WISH analysis of the HAND2 target gene *Pitx2*, whose transcript levels are significantly altered in mutant AVCs by RNA-Seq analysis. No changes in the spatial distribution of *Pitx2* transcripts are detected. (B) Colocalization of HAND2<sup>3xF</sup> proteins (green fluorescence) with the SOX9 transcriptional regulators (red fluorescence) in the AVC of wild-type (*Hand2<sup>3xF/3xF</sup>*) and *Hand2*-deficient (*Hand2<sup>Δ/Δ</sup>*) mouse embryos at E9.5. Asterisks in the enlargement (upper panels) point to SOX9-positive delaminating mesenchymal cells in the AVC, which are lacking in the *Hand2*-deficient AVC. Scale bar: 100 $\mu$ m. (C) Infection of wild-type AVC explants with GFP and SNAI1-GFP adenovirus (using  $6 \times 10^6$  PFU for either virus per sample) indicates that GFP virus infects AVC cells slightly more efficiently than SNAI1-GFP virus. Therefore, the observed partial restoration of cell migration in *Hand2*-deficient AVCs infected with SNAI1-GFP virus is likely slightly underestimated (Figure 6B).

Figure S6

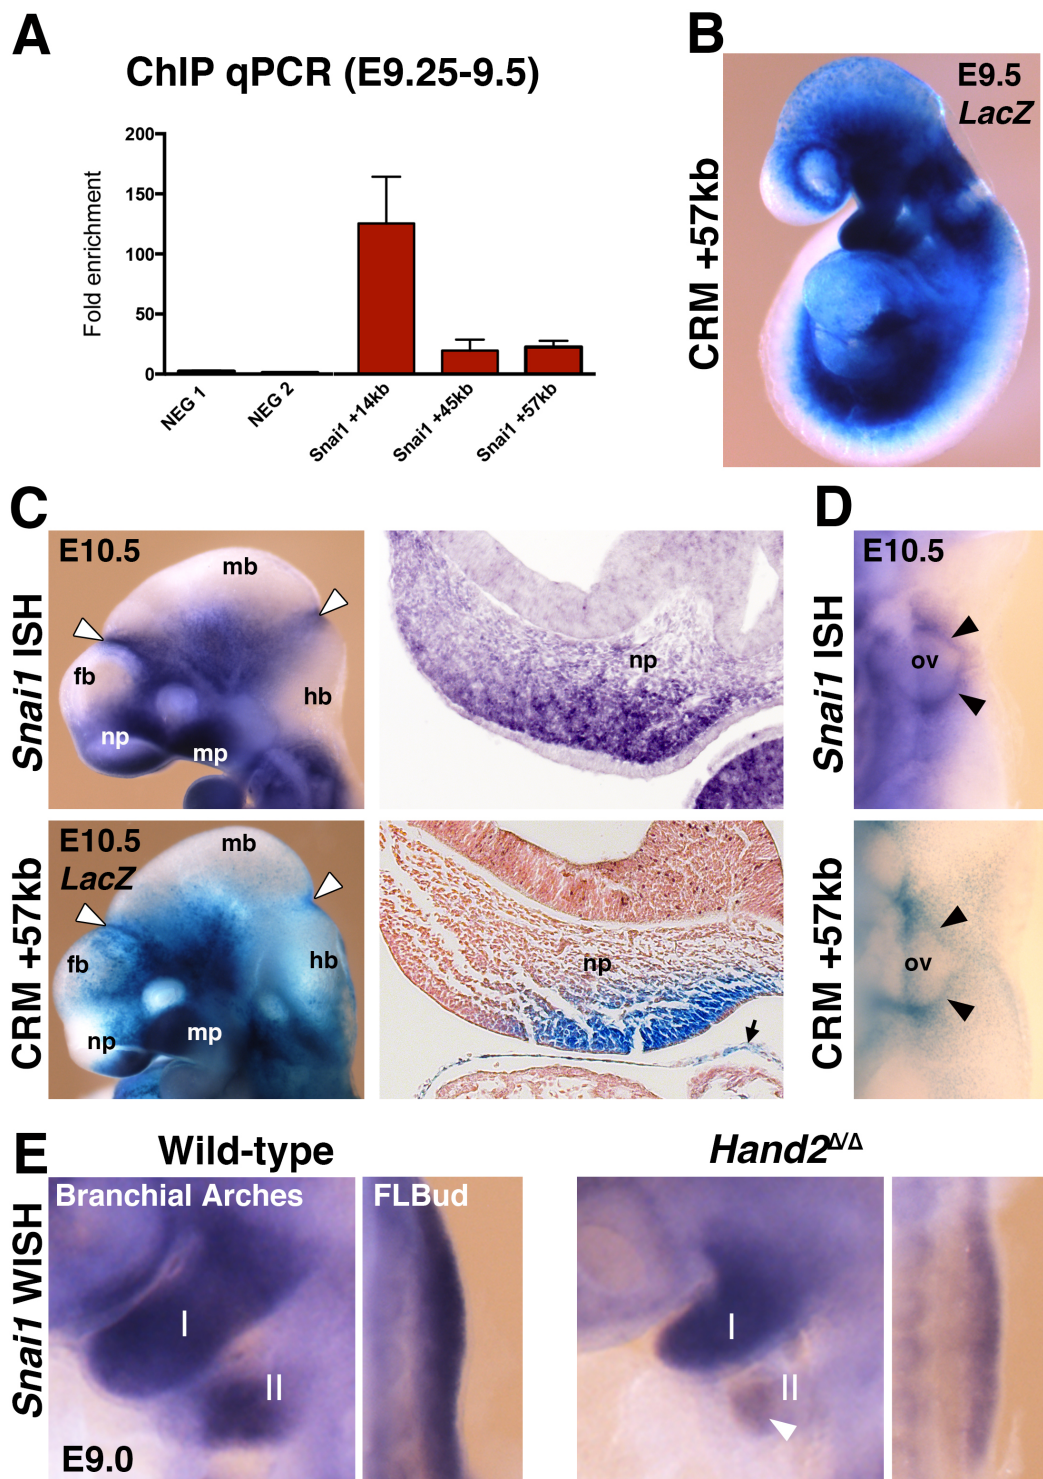

Figure S6 (related to Figure 6). The *Snai1* transcript distribution overlaps the CRM+57kb activity in craniofacial structures, branchial arches and early limb buds.

(A) ChIP-qPCR validation of the enrichment of the three CRMs in HAND2 chromatin complexes from embryonic hearts (E9.25-E9.5, n=2; mean  $\pm$ SD). (B) The expression pattern of the *Snai1* CRM+57kb *LacZ* reporter transgene at E9.5. (C) *Snai1* expression and activity of the CRM+57kb *LacZ* reporter

transgene in craniofacial structures. The enhancer activity overlaps well with the domain of *Snail* transcripts in the nasal prominence (np), maxillary process (mp), fore-midbrain and mid-hindbrain boundaries (white arrowheads). fb: forebrain, mb: midbrain, hb: hindbrain. Black arrow points to the epicardium. (D) Expression of *Snail* and the CRM+57kb LacZ reporter transgene in migrating cardiac neural crest cells (black arrowheads) enveloping the otic vesicle (ov). (E) *Snail* expression is reduced in the 2nd branchial arch (II) and early forelimb buds in *Hand2*-deficient mouse embryos (E9.0)



## Supplemental Tables

**Table S1 (related to Figure 1). List of the statistically validated HAND2 ChIP-Seq peaks in the dataset from mouse embryonic hearts (E10.5) and associated genes.**

**An Excel table of all peak IDs and coordinates (mm9) is included as a separate file (Supplemental Table S1).**

GREAT was used to associate peaks to the nearest genes. Distances between the ChIP-Seq peak summit and the transcriptional start sites located within  $\leq 1\text{Mb}$  are indicated. Peak ID is based on the decreasing value of the combined log<sub>2</sub>-enrichment from the two ChIP-Seq samples versus their inputs (MACS).

**Table S2 (related to Figure 1). HAND2-enriched genomic regions associated to genes whose altered expression in *Hand2*-deficient mouse embryonic hearts have been published.**

GREAT analysis revealed the association of HAND2 ChIP-Seq peaks with genes whose altered expression in *Hand2*-deficient hearts has been previously established by others (see references for details). For each gene, the numbers of genomic regions significantly enriched in HAND2 chromatin complexes in mouse embryonic hearts at E10.5 is indicated. The exact coordinates of the associated peaks are listed in Table S1, which is an Excel table that can be easily searched by gene name.

| Gene           | No. of ChIP-Seq Peaks | Reference                                           |
|----------------|-----------------------|-----------------------------------------------------|
| <i>Adam19</i>  | 1                     | (Holler et al., 2010)                               |
| <i>Ankrd6</i>  | 5                     | Holler et al., 2010                                 |
| <i>Anxa6</i>   | 1                     | Holler et al., 2010                                 |
| <i>Armc9</i>   | 1                     | (Tsuchihashi et al., 2011)                          |
| <i>Bin1</i>    | 4                     | Tsuchihashi et al., 2011                            |
| <i>Bmp5</i>    | 3                     | Tsuchihashi et al., 2011                            |
| <i>Brp44l</i>  | 1                     | Tsuchihashi et al., 2011                            |
| <i>Cad</i>     | 1                     | Tsuchihashi et al., 2011                            |
| <i>Camk2a</i>  | 1                     | Holler et al., 2010                                 |
| <i>Cdk6</i>    | 4                     | Holler et al., 2010                                 |
| <i>Clasp2</i>  | 1                     | Holler et al., 2010                                 |
| <i>Col11a1</i> | 1                     | Holler et al., 2010                                 |
| <i>Dll4</i>    | 1                     | (VanDusen et al., 2014)                             |
| <i>Ece1</i>    | 4                     | Tsuchihashi et al., 2011                            |
| <i>EfnB2</i>   | 5                     | Van Dusen et al., 2014                              |
| <i>Eid3</i>    | 2                     | Tsuchihashi et al., 2011                            |
| <i>Foxc1</i>   | 9                     | Holler et al., 2010                                 |
| <i>Foxp2</i>   | 1                     | Holler et al., 2010                                 |
| <i>Gata4</i>   | 5                     | Tsuchihashi et al., 2011; (Srivastava et al., 1997) |
| <i>Gja5</i>    | 6                     | Holler et al., 2010; (McFadden et al., 2005)        |
| <i>Gli3</i>    | 5                     | Holler et al., 2010                                 |
| <i>Has2</i>    | 9                     | Tsuchihashi et al., 2011                            |
| <i>Hey1</i>    | 7                     | Holler et al., 2010                                 |
| <i>Hspa8</i>   | 1                     | Tsuchihashi et al., 2011                            |
| <i>Insm1</i>   | 2                     | Holler et al., 2010                                 |
| <i>Irx4</i>    | 3                     | (Bruneau et al., 2000)                              |
| <i>Itga9</i>   | 6                     | Holler et al., 2010                                 |
| <i>Klf4</i>    | 4                     | Tsuchihashi et al., 2011                            |
| <i>Lgi2</i>    | 3                     | Tsuchihashi et al., 2011                            |
| <i>Ltbpl</i>   | 11                    | Holler et al., 2010                                 |
| <i>Lyve1</i>   | 1                     | Van Dusen et al., 2014                              |
| <i>Nav1</i>    | 10                    | Holler et al., 2010                                 |
| <i>Nebl</i>    | 9                     | Villanueva et al., 2002                             |
| <i>Nrg1</i>    | 7                     | Van Dusen et al., 2014                              |
| <i>Nrip1</i>   | 1                     | Tsuchihashi et al., 2011                            |
| <i>Nrp1</i>    | 9                     | Van Dusen et al., 2014                              |

|                 |    |                               |
|-----------------|----|-------------------------------|
| <i>Pank1</i>    | 1  | Tsuchihashi et al., 2011      |
| <i>Pard3</i>    | 15 | Holler et al., 2010           |
| <i>Parp1</i>    | 3  | Tsuchihashi et al., 2011      |
| <i>Pdgrfa</i>   | 3  | (Barnes et al., 2011)         |
| <i>Peli1</i>    | 5  | Tsuchihashi et al., 2011      |
| <i>Plxna2</i>   | 8  | (Morikawa and Cserjesi, 2008) |
| <i>Postn</i>    | 2  | Barnes et al., 2011           |
| <i>Rbm26</i>    | 3  | Tsuchihashi et al., 2011      |
| <i>Slc39a10</i> | 4  | Tsuchihashi et al., 2011      |
| <i>Slc45a1</i>  | 8  | Tsuchihashi et al., 2011      |
| <i>Snrpd3</i>   | 1  | Tsuchihashi et al., 2011      |
| <i>Sox11</i>    | 13 | Holler et al., 2010           |
| <i>Stat5b</i>   | 1  | Holler et al., 2010           |
| <i>Syne1</i>    | 6  | Tsuchihashi et al., 2011      |
| <i>Tgif2</i>    | 1  | Holler et al., 2010           |
| <i>Tmem164</i>  | 3  | Tsuchihashi et al., 2011      |
| <i>Tmem87b</i>  | 2  | Tsuchihashi et al., 2011      |
| <i>Tor1aip1</i> | 1  | Tsuchihashi et al., 2011      |
| <i>Vegfa</i>    | 3  | Van Dusen et al., 2014        |
| <i>Zfp516</i>   | 12 | Tsuchihashi et al., 2011      |

**Table S3 (related to Figure 1 and S2). HAND2 CHIP-Seq peaks overlapping VISTA enhancers active in mouse embryonic hearts.**

The peak ID is based on MACS enrichment. Distances from the CHIP-Seq peak summit to the transcriptional start sites of the neighboring genes are indicated.

| Peak ID | Coordinates (mm9) |           |           | VISTA CRM | Gene 1          | Distance (kb) | Gene 2               | Distance (kb) |
|---------|-------------------|-----------|-----------|-----------|-----------------|---------------|----------------------|---------------|
| 1       | chr10             | 44949251  | 44950666  | mm87      | <i>Popdc3</i>   | -59152        | <i>Prep</i>          | +162937       |
| 12      | chr17             | 12982708  | 12984914  | mm89      | <i>Igf2r</i>    | -21281        | <i>Mas1</i>          | +77198        |
| 19      | chr3              | 151967094 | 151968437 | mm72      | <i>Nexn</i>     | -38482        | <i>Fam73a</i>        | +35605        |
| 20      | chr4              | 13759583  | 13760910  | hs1658    | <i>Runx1t1</i>  | +89664        | <i>Slc26a7</i>       | +788705       |
| 64      | chr3              | 104402785 | 104404252 | mm143     | <i>Lrig2</i>    | -87740        | <i>Slc16a1</i>       | -39072        |
| 121     | chr5              | 93056454  | 93057879  | mm187     | <i>Sbtl1</i>    | +25090        | <i>Ccdc158</i>       | +46984        |
| 129     | chr18             | 80525766  | 80528682  | mm152     | <i>Kcng2</i>    | -34152        | <i>Ctdp1</i>         | +139210       |
| 155     | chr5              | 150122171 | 150124072 | hs1515    | <i>Medag</i>    | -91202        | <i>Alox5ap</i>       | +46488        |
| 167     | chr11             | 11861513  | 11862778  | mm178     | <i>Ddc</i>      | -64099        | <i>Grb10</i>         | +75258        |
| 196     | chr13             | 46665895  | 46668189  | mm132     | <i>C78339</i>   | -97849        | <i>Cap2</i>          | +69825        |
| 217     | chr12             | 80635258  | 80636662  | hs1392    | <i>Rad51b</i>   | +234409       | <i>Zfp3611</i>       | +578040       |
| 269     | chr11             | 65021000  | 65023882  | mm67      | <i>Arhgap44</i> | -45978        | <i>Myocd</i>         | +61002        |
| 344     | chr3              | 20045122  | 20046194  | mm86      | <i>Gyg</i>      | +9558         | <i>Hltf</i>          | +87847        |
| 353     | chr10             | 30772605  | 30773747  | mm763     | <i>Hey2</i>     | -210569       | <i>Gm5422</i>        | -194815       |
| 368     | chr8              | 97950228  | 97951513  | mm71      | <i>Gtl3</i>     | +7898         | <i>Mmp15</i>         | +74703        |
| 413     | chr3              | 137447812 | 137448973 | mm4       | <i>H2afz</i>    | -79058        | <i>Ddit4l</i>        | +161757       |
| 448     | chr5              | 132704995 | 132706570 | mm131     | <i>Wbscr17</i>  | -921995       | <i>Auts2</i>         | +311910       |
| 453     | chr7              | 87589003  | 87591609  | mm169     | <i>Furin</i>    | -42658        | <i>Blm</i>           | +89699        |
| 524     | chr8              | 28216047  | 28218609  | mm136     | <i>Gpr124</i>   | +21015        | <i>Brf2</i>          | +21776        |
| 634     | chr9              | 24778152  | 24779709  | hs463     | <i>Tbx20</i>    | -200185       | <i>Gm10181</i>       | -114935       |
| 656     | chr4              | 120064659 | 120066408 | mm145     | <i>Foxo6</i>    | -105580       | <i>Scmh1</i>         | -54218        |
| 757     | chr12             | 84173003  | 84175084  | mm78      | <i>Rgs6</i>     | +87746        | <i>Dpf3</i>          | +277838       |
| 834     | chr9              | 24692274  | 24693500  | mm130     | <i>Gm10181</i>  | -200979       | <i>Tbx20</i>         | -114141       |
| 962     | chr4              | 94984035  | 94985383  | mm308     | <i>Jun</i>      | -265796       | <i>Fggy</i>          | -239489       |
| 1263    | chr10             | 39378652  | 39380031  | hs1690    | <i>Rev3l</i>    | -72582        | <i>Traf3ip2</i>      | +46602        |
| 1290    | chr14             | 55615136  | 55616687  | mm771     | <i>Myh7</i>     | -2441         |                      |               |
| 1383    | chr7              | 75156457  | 75157757  | hs1932    | <i>Igf1r</i>    | +59394        | <i>Pgpep11</i>       | +252012       |
| 1436    | chr5              | 77558679  | 77560618  | mm770     | <i>Hopx</i>     | -15463        | <i>Spink2</i>        | +80847        |
| 1518    | chr17             | 35856079  | 35859456  | mm90      | <i>Ier3</i>     | -100861       | <i>Ddr1</i>          | -20213        |
| 1531    | chr8              | 80511878  | 80513042  | mm172     | <i>Ednra</i>    | -264125       | <i>Ttc29</i>         | -224781       |
| 1541    | chr14             | 63678867  | 63681757  | mm244     | <i>Ctcb</i>     | -60990        | <i>Defb42</i>        | +14484        |
| 1835    | chr15             | 83466745  | 83472118  | mm84      | <i>Till12</i>   | -43845        | <i>Scube1</i>        | +86019        |
| 1954    | chr4              | 133285123 | 133286525 | hs569     | <i>Pigv</i>     | -57262        | <i>Arid1a</i>        | +23702        |
| 2191    | chr2              | 113948688 | 113949705 | mm182     | <i>Actc1</i>    | -70574        | <i>Aqr</i>           | +51878        |
| 2219    | chr8              | 35015890  | 35017195  | mm70      | <i>Rbpms</i>    | +23770        | <i>Gtf2e2</i>        | +174157       |
| 2465    | chr17             | 73371361  | 73372925  | mm82      | <i>Lclat1</i>   | -85191        | <i>Lbh</i>           | +104498       |
| 2486    | chr12             | 86776513  | 86777917  | hs1657    | <i>Tmed10</i>   | -61548        | <i>Fos</i>           | -37625        |
| 3190    | chr18             | 61810650  | 61815847  | hs1752    | <i>Ill17b</i>   | -34340        | <i>Csnk1a1</i>       | +98321        |
| 3236    | chr6              | 72164733  | 72167870  | mm123     | <i>Atoh8</i>    | +19269        | <i>St3gal5</i>       | +118695       |
| 3596    | chr10             | 56700222  | 56701185  | mm74      | <i>Hsf2</i>     | -505487       | <i>Gm9956</i>        | +235764       |
| 3662    | chr18             | 11371587  | 11374309  | mm138     | <i>Rbbp8</i>    | -418837       | <i>Gata6</i>         | +320440       |
| 3757    | chr11             | 65461505  | 65462818  | mm85      | <i>Myocd</i>    | -378719       | <i>Map2k4</i>        | +139637       |
| 3928    | chr10             | 30948623  | 30949641  | mm762     | <i>Hey2</i>     | -386525       | <i>Gm5422</i>        | -18859        |
| 4335    | chr13             | 42353478  | 42354514  | mm235     | <i>Edn1</i>     | -42643        | <i>Hivep1</i>        | +206606       |
| 4422    | chr5              | 122542160 | 122545553 | mm77      | <i>Cux2</i>     | -43997        | <i>My12</i>          | -7103         |
| 5216    | chr11             | 77236747  | 77237741  | mm146     | <i>Coro6</i>    | -40169        | <i>Ssh2</i>          | +207455       |
| 5317    | chr17             | 7471879   | 7478563   | mm108     | <i>Tep10a</i>   | -53814        | <i>Rps6ka2</i>       | +100757       |
| 5334    | chr7              | 150296444 | 150299172 | mm183     | <i>Kcnq1</i>    | +4649         | <i>Cdkn1c</i>        | +349147       |
| 5435    | chr2              | 59666469  | 59670298  | mm282     | <i>Wdsub1</i>   | +52257        | <i>Tanc1</i>         | +218283       |
| 5450    | chr12             | 86795520  | 86797109  | mm260     | <i>Tmed10</i>   | -80648        | <i>Fos</i>           | -18525        |
| 5616    | chr10             | 80234668  | 80240792  | mm200     | <i>Sf3a2</i>    | -23213        | <i>Dot11</i>         | +19779        |
| 5624    | chr4              | 118690811 | 118693030 | mm165     | <i>Slc2a1</i>   | -89395        | <i>Lao1</i>          | +57738        |
| 5905    | chr9              | 47183420  | 47185651  | mm251     | <i>Cadm1</i>    | -153804       |                      |               |
| 7081    | chr19             | 53790405  | 53792424  | mm64      | <i>Pdcd4</i>    | -175306       | <i>Rbm20</i>         | +39619        |
| 7605    | chr13             | 73435705  | 73437570  | mm68      | <i>Gm10263</i>  | -18664        | <i>Irx4</i>          | +38693        |
| 7892    | chr19             | 40542066  | 40543214  | hs2353    | <i>Pdlim1</i>   | -196534       | <i>Sorbs1</i>        | +45629        |
| 7898    | chr8              | 123693474 | 123697140 | mm241     | <i>Foxc2</i>    | +55236        | <i>I700018B08Rik</i> | +370547       |
| 7946    | chr12             | 12185772  | 12187084  | mm103     | <i>Fam49a</i>   | -82517        | <i>Rad51ap2</i>      | +723543       |
| 8076    | chr4              | 153766741 | 153769146 | hs1912    | <i>Arhgef16</i> | -93781        | <i>Prdm16</i>        | +243031       |
| 8149    | chr1              | 92876838  | 92877812  | hs1945    | <i>Lrrfip1</i>  | -72696        | <i>Rab17</i>         | -11087        |
| 8200    | chr11             | 46015056  | 46016378  | mm102     | <i>Nipal4</i>   | -35707        | <i>Fnde9</i>         | -33316        |
| 9393    | chr17             | 12985103  | 12986168  | mm89      | <i>Igf2r</i>    | -23106        | <i>Mas1</i>          | +75373        |
| 9430    | chr14             | 63986052  | 63989651  | mm245     | <i>Gata4</i>    | -123744       | <i>Blk</i>           | +48172        |
| 9473    | chr18             | 14055424  | 14056614  | hs369     | <i>Zfp521</i>   | +75223        | <i>Hrh4</i>          | +890520       |
| 9792    | chr5              | 38900176  | 38902270  | mm253     | <i>Slc2a9</i>   | -29678        | <i>Wdr1</i>          | +51682        |
| 10090   | chr9              | 63891864  | 63893712  | mm69      | <i>Lct1</i>     | -72166        | <i>Smad6</i>         | -22922        |
| 10093   | chr18             | 11077550  | 11078792  | hs502     | <i>Rbbp8</i>    | -713614       | <i>Gata6</i>         | +25663        |
| 10172   | chr1              | 39499627  | 39501386  | hs1933    | <i>Tbc1d8</i>   | +35085        | <i>Rpl31</i>         | +75811        |
| 10217   | chr14             | 26403212  | 26409922  | hs1767    | <i>Ppif</i>     | -107089       | <i>Zmiz1</i>         | +127857       |
| 10492   | chr17             | 49829797  | 49831340  | mm276     | <i>Kif6</i>     | +76072        | <i>Rftn1</i>         | +499430       |
| 11712   | chr10             | 30717765  | 30718810  | mm766     | <i>Gm5422</i>   | -249703       | <i>Hey2</i>          | -155681       |

**Table S4 (related to Figures 1 and S3). HAND2 target genes annotated to GO terms relevant for outflow tract and right ventricle development.**

The expression of genes highlighted was comparatively analyzed in wild-type and *Hand2*-deficient embryos.

| <b>Outflow tract HAND2 target genes (n=43)</b><br>BP:0003151: outflow tract morphogenesis<br>MP:0006126: abnormal outflow tract development | <b>Right ventricle HAND2 target genes (n=105)</b><br>BP:0003205: cardiac chamber development<br>MP:0003920: abnormal heart right ventricle morphology | <b>OFT and RV shared HAND2 target genes (n=59)</b> |               |
|---------------------------------------------------------------------------------------------------------------------------------------------|-------------------------------------------------------------------------------------------------------------------------------------------------------|----------------------------------------------------|---------------|
| <i>Aldh1a2</i>                                                                                                                              | <i>Abca1</i>                                                                                                                                          | <i>Mef2a</i>                                       | <i>Acvr1</i>  |
| <i>Ate1</i>                                                                                                                                 | <i>Adam12</i>                                                                                                                                         | <i>Myh10</i>                                       | <i>Adam19</i> |
| <i>Aif2</i>                                                                                                                                 | <i>Adams1</i>                                                                                                                                         | <i>Myh7</i>                                        | <i>Bmp10</i>  |
| <i>Bmpr1a</i>                                                                                                                               | <i>Adora2a</i>                                                                                                                                        | <i>Myl2</i>                                        | <i>Bmp4</i>   |
| <i>Cdh5</i>                                                                                                                                 | <i>Adra2b</i>                                                                                                                                         | <i>Myl3</i>                                        | <i>Cc2d2a</i> |
| <i>Dicer1</i>                                                                                                                               | <i>Ahr</i>                                                                                                                                            | <i>Mylk3</i>                                       | <i>Chrd</i>   |
| <i>Ecel</i>                                                                                                                                 | <i>Ank2</i>                                                                                                                                           | <i>Myocd</i>                                       | <i>Cited2</i> |
| <i>Ednra</i>                                                                                                                                | <i>Arid1a</i>                                                                                                                                         | <i>Myoz2</i>                                       | <i>Cxcr7</i>  |
| <i>Eng</i>                                                                                                                                  | <i>Atp2a2</i>                                                                                                                                         | <i>Ngf</i>                                         | <i>Egf10</i>  |
| <i>Eva1</i>                                                                                                                                 | <i>Bmpr2</i>                                                                                                                                          | <i>Notch1</i>                                      | <i>Fgfr2</i>  |
| <i>Fbln1</i>                                                                                                                                | <i>Btc</i>                                                                                                                                            | <i>Notch2</i>                                      | <i>Foxc2</i>  |
| <i>Fn1</i>                                                                                                                                  | <i>Cacna1c</i>                                                                                                                                        | <i>Nphp3</i>                                       | <i>Fzd1</i>   |
| <i>Foxp1</i>                                                                                                                                | <i>Cav3</i>                                                                                                                                           | <i>Npr1</i>                                        | <i>Gata4</i>  |
| <i>Irx3</i>                                                                                                                                 | <i>Cdh2</i>                                                                                                                                           | <i>Opa3</i>                                        | <i>Gata5</i>  |
| <i>Irx5</i>                                                                                                                                 | <i>Cep110</i>                                                                                                                                         | <i>Ovol2</i>                                       | <i>Gata6</i>  |
| <i>Jun</i>                                                                                                                                  | <i>Col11a1</i>                                                                                                                                        | <i>Pdgfb</i>                                       | <i>Gja1</i>   |
| <i>Kenh2</i>                                                                                                                                | <i>Cpe</i>                                                                                                                                            | <i>Pdlim3</i>                                      | <i>Gja5</i>   |
| <i>Ltbp1</i>                                                                                                                                | <i>Cxcr4</i>                                                                                                                                          | <i>Pdpm1</i>                                       | <i>Hand1</i>  |
| <i>Map2k5</i>                                                                                                                               | <i>Cyr61</i>                                                                                                                                          | <i>Pkp2</i>                                        | <i>Hand2</i>  |
| <i>Meox2</i>                                                                                                                                | <i>Dand5</i>                                                                                                                                          | <i>Pla2g4a</i>                                     | <i>Has2</i>   |
| <i>Mkl1</i>                                                                                                                                 | <i>Des</i>                                                                                                                                            | <i>Plce1</i>                                       | <i>Hes1</i>   |
| <i>Mkl2</i>                                                                                                                                 | <i>Dll4</i>                                                                                                                                           | <i>Pou4f1</i>                                      | <i>Hey1</i>   |
| <i>Nedd4</i>                                                                                                                                | <i>Dnahc11</i>                                                                                                                                        | <i>Pparg</i>                                       | <i>Hey2</i>   |
| <i>Nipbl</i>                                                                                                                                | <i>Dnaja3</i>                                                                                                                                         | <i>Prox1</i>                                       | <i>Heyl</i>   |
| <i>Nrp2</i>                                                                                                                                 | <i>Dock1</i>                                                                                                                                          | <i>Ramp2</i>                                       | <i>Hhex</i>   |
| <i>Nxn</i>                                                                                                                                  | <i>Dsp</i>                                                                                                                                            | <i>Rbm15</i>                                       | <i>Hif1a</i>  |
| <i>Pcsk5</i>                                                                                                                                | <i>Edn1</i>                                                                                                                                           | <i>Robo1</i>                                       | <i>Hoxa1</i>  |
| <i>Pdgfra</i>                                                                                                                               | <i>Ejfnb2</i>                                                                                                                                         | <i>Ryr2</i>                                        | <i>Isl1</i>   |
| <i>Pds5a</i>                                                                                                                                | <i>Egfr</i>                                                                                                                                           | <i>Sall1</i>                                       | <i>Jag1</i>   |
| <i>Pds5b</i>                                                                                                                                | <i>Egln1</i>                                                                                                                                          | <i>Sen5a</i>                                       | <i>Mef2c</i>  |
| <i>Plxnd1</i>                                                                                                                               | <i>ErbB4</i>                                                                                                                                          | <i>Sema3a</i>                                      | <i>Mesp1</i>  |
| <i>Rarb</i>                                                                                                                                 | <i>Fbln5</i>                                                                                                                                          | <i>Shox2</i>                                       | <i>Msx2</i>   |
| <i>Rdh10</i>                                                                                                                                | <i>Fbn1</i>                                                                                                                                           | <i>Slco2a1</i>                                     | <i>Nfatc1</i> |
| <i>Sec24b</i>                                                                                                                               | <i>Fgf9</i>                                                                                                                                           | <i>Slit3</i>                                       | <i>Nkx2-5</i> |
| <i>Shh</i>                                                                                                                                  | <i>Fgfr1</i>                                                                                                                                          | <i>Smad7</i>                                       | <i>Nif3</i>   |
| <i>Six1</i>                                                                                                                                 | <i>Fgfr11</i>                                                                                                                                         | <i>Smarca4</i>                                     | <i>Nirk3</i>  |
| <i>Snai1</i>                                                                                                                                | <i>Fhl2</i>                                                                                                                                           | <i>Smarca3</i>                                     | <i>Parva</i>  |
| <i>Sox17</i>                                                                                                                                | <i>Foxc1</i>                                                                                                                                          | <i>Srf</i>                                         | <i>Pdgfrb</i> |
| <i>Tfap2a</i>                                                                                                                               | <i>Foxf1</i>                                                                                                                                          | <i>Tbx5</i>                                        | <i>Phc1</i>   |
| <i>Tgfb2</i>                                                                                                                                | <i>Frs2</i>                                                                                                                                           | <i>Tek</i>                                         | <i>Pitx2</i>  |
| <i>Thbs1</i>                                                                                                                                | <i>Gab1</i>                                                                                                                                           | <i>Thbd</i>                                        | <i>Pipn11</i> |
| <i>Twist1</i>                                                                                                                               | <i>Gata3</i>                                                                                                                                          | <i>Timp4</i>                                       | <i>Rbpj</i>   |
| <i>Vegfa</i>                                                                                                                                | <i>Gsk3a</i>                                                                                                                                          | <i>Tnn1</i>                                        | <i>Rxra</i>   |
|                                                                                                                                             | <i>Gucy1a3</i>                                                                                                                                        | <i>Tnn2</i>                                        | <i>Sfrp2</i>  |
|                                                                                                                                             | <i>Hdac2</i>                                                                                                                                          | <i>Tpm1</i>                                        | <i>Smad6</i>  |
|                                                                                                                                             | <i>Hectd1</i>                                                                                                                                         | <i>Wnt2</i>                                        | <i>Sox11</i>  |
|                                                                                                                                             | <i>Heg1</i>                                                                                                                                           |                                                    | <i>Sox4</i>   |
|                                                                                                                                             | <i>Hmox1</i>                                                                                                                                          |                                                    | <i>Tbx1</i>   |
|                                                                                                                                             | <i>Id2</i>                                                                                                                                            |                                                    | <i>Tbx2</i>   |
|                                                                                                                                             | <i>Iff88</i>                                                                                                                                          |                                                    | <i>Tbx20</i>  |
|                                                                                                                                             | <i>Igf2</i>                                                                                                                                           |                                                    | <i>Tbx3</i>   |
|                                                                                                                                             | <i>Igf2r</i>                                                                                                                                          |                                                    | <i>Tdg</i>    |
|                                                                                                                                             | <i>Itgbl1</i>                                                                                                                                         |                                                    | <i>Tgfb2</i>  |
|                                                                                                                                             | <i>Jup</i>                                                                                                                                            |                                                    | <i>Tgfb3</i>  |
|                                                                                                                                             | <i>Ldb3</i>                                                                                                                                           |                                                    | <i>Vangl2</i> |
|                                                                                                                                             | <i>Lefty2</i>                                                                                                                                         |                                                    | <i>Vcan</i>   |
|                                                                                                                                             | <i>Lmna</i>                                                                                                                                           |                                                    | <i>Wnt11</i>  |
|                                                                                                                                             | <i>Lmo4</i>                                                                                                                                           |                                                    | <i>Wnt5a</i>  |
|                                                                                                                                             | <i>Luzp1</i>                                                                                                                                          |                                                    | <i>Zfp2</i>   |

**Table S5 (related to Figure 4 and S4). Comparative transcriptome analysis of the genes expressed in wild-type and *Hand2*-deficient AVCs (E9.25-E9.5).**

**An Excel table of all expressed genes is included as a separate file (Supplemental Table S5).**

In addition to the gene names the following parameters are shown. log2 FC: log2 fold change in normalized expression levels between wild-type (n=3) and mutant AVC transcriptomes (n=4). PValue: p-value indicating statistical significance of the observed differences. FDR: false discovery rate (given as E = exponential value). Expression in *Hand2* mut: indicates if transcript levels in the *Hand2*-deficient AVC samples (compared to wild-type AVC) are reduced (DOWN), unchanged (UNCHANGED) or increased (UP). HAND2 ChIP Peak: YES indicates that the gene is associated with regions enriched by HAND2 ChIP-Seq analysis, NO: no associated HAND2 ChIP-Seq peaks. In addition to the list of all expressed genes, lists showing all significantly up-regulated (up\_reg\_genes) and down-regulated genes (down\_reg\_genes) are also included.

**Table S6 (related to Figures 4D, 5, 6 and S5). Difference in expression levels of HAND2 target genes with functions in EMT and/or AVC cardiac cushion development**

This table lists the actual values for all HAND2 target genes in the AVC shown in Figure 4D and analyzed in Figures 5,6 and S5. RPM: reads per million sequenced reads; log2 FC: log2 fold change; linear FC: linear fold change; p-Value: statistical significance, indicated as exponential value; FDR: false discovery rate, indicated as exponential value; DEG: differentially expressed gene; DOWN: reduced transcript levels in mutant AVC samples; UP: increased transcript levels in mutant AVC samples

| Gene    | RPM mutant AVC samples |        |        |        | RPM wt AVC samples |        |        | log2 FC | linear FC | p-Value   | FDR       | DEG  |
|---------|------------------------|--------|--------|--------|--------------------|--------|--------|---------|-----------|-----------|-----------|------|
|         | 1                      | 2      | 3      | 4      | 1                  | 2      | 3      |         |           |           |           |      |
| Hand2   | 0.19                   | 0.82   | 0.36   | 0.37   | 49.14              | 44.00  | 44.47  | -6.73   | -106.38   | 6.85E-114 | 7.66E-110 | DOWN |
| Twist1  | 4.51                   | 3.67   | 8.09   | 3.10   | 20.25              | 17.33  | 24.06  | -2.09   | -4.26     | 2.44E-12  | 3.92E-10  | DOWN |
| Msx1    | 1.20                   | 1.11   | 1.71   | 1.79   | 3.80               | 1.83   | 6.29   | -1.46   | -2.74     | 5.48E-04  | 9.10E-03  | DOWN |
| Sox9    | 46.09                  | 43.27  | 55.95  | 57.36  | 93.61              | 78.65  | 192.27 | -1.27   | -2.41     | 5.85E-07  | 3.22E-05  | DOWN |
| Snai1   | 3.01                   | 3.67   | 4.90   | 5.32   | 9.44               | 7.30   | 13.00  | -1.24   | -2.36     | 2.70E-05  | 8.15E-04  | DOWN |
| Hnrnpab | 185.57                 | 198.29 | 285.61 | 143.13 | 371.12             | 469.47 | 269.96 | -0.88   | -1.84     | 1.23E-04  | 2.94E-03  | DOWN |
| Has2    | 40.33                  | 66.56  | 53.01  | 72.78  | 79.40              | 63.62  | 145.37 | -0.74   | -1.67     | 4.63E-03  | 4.16E-02  | DOWN |
| Glipr2  | 187.54                 | 236.90 | 184.96 | 234.11 | 121.92             | 102.84 | 182.02 | 0.62    | 1.54      | 2.13E-03  | 2.47E-02  | UP   |
| Pitx2   | 56.68                  | 70.23  | 60.05  | 60.54  | 42.50              | 33.32  | 43.39  | 0.62    | 1.54      | 3.41E-04  | 6.33E-03  | UP   |
| Vasn    | 11.64                  | 12.25  | 15.89  | 9.60   | 7.89               | 7.48   | 6.33   | 0.76    | 1.69      | 1.73E-03  | 2.14E-02  | UP   |
| Kdr     | 88.01                  | 116.98 | 85.33  | 89.83  | 54.56              | 52.30  | 39.44  | 0.94    | 1.92      | 3.75E-07  | 2.15E-05  | UP   |
| Gja5    | 58.12                  | 81.82  | 36.79  | 101.62 | 36.97              | 36.30  | 25.25  | 1.06    | 2.08      | 1.87E-04  | 4.01E-03  | UP   |
| Hey1    | 50.94                  | 27.98  | 64.33  | 42.07  | 19.44              | 27.82  | 17.28  | 1.10    | 2.15      | 2.93E-05  | 8.66E-04  | UP   |
| Tmem100 | 31.55                  | 30.70  | 20.79  | 35.23  | 14.79              | 16.14  | 9.27   | 1.12    | 2.18      | 4.35E-06  | 1.70E-04  | UP   |
| Cyr61   | 56.34                  | 159.33 | 89.76  | 83.69  | 47.08              | 36.20  | 39.37  | 1.23    | 2.34      | 9.77E-06  | 3.43E-04  | UP   |
| Hhex    | 14.37                  | 12.28  | 21.73  | 9.38   | 5.37               | 7.15   | 4.88   | 1.31    | 2.48      | 9.42E-06  | 3.37E-04  | UP   |
| ErbB4   | 3.62                   | 6.93   | 6.39   | 5.00   | 2.27               | 2.05   | 2.20   | 1.31    | 2.49      | 1.07E-04  | 2.61E-03  | UP   |
| Tll1    | 3.17                   | 4.68   | 3.41   | 4.20   | 0.62               | 1.11   | 0.63   | 2.28    | 4.84      | 9.30E-09  | 7.65E-07  | UP   |
| Acvr11  | 12.53                  | 8.93   | 7.44   | 11.57  | 2.31               | 1.62   | 1.01   | 2.59    | 6.02      | 3.48E-14  | 8.46E-12  | UP   |

## Supplemental Experimental Procedures

### ChIP-Seq peak-calling and data analysis

The number of reads sequenced/aligned per ChIP-Seq sample were as follows:

| Sample              | No. of reads sequenced | No. of reads mapped to the genome |
|---------------------|------------------------|-----------------------------------|
| Replicate A (ChIP)  | 139,781,750            | 112,355,481                       |
| Replicate A (input) | 60,489,198             | 46,937,735                        |
| Replicate B (ChIP)  | 102,690,152            | 70,308,925                        |
| Replicate B (input) | 67,745,942             | 51,072,733                        |

Reads were mapped to the mouse genome (NCBI37/mm9) using the qAlign function from QuasR (Gaidatzis et al., 2015) package with default parameters, except that up to 10 hits in the genome were allowed. The sample specific fragment sizes were estimated from cross correlation profiles of read density on both chromosomal strands using the Chipcor software (<http://ccg.vital-it.ch/chipseq>). Reads were shifted by half of the fragment size (100bp) towards the middle of the fragment. Peaks were detected using MACS (Zhang et al., 2008) (version 1.4.2, with parameters `--tsize=50 --pvalue=1e-5 --mfold=10,30 --nomodel --shiftsize=100 --keep-dup=1`) for the pooled replicates of ChIP samples in combination with pooled input controls. Peaks were sorted based on the enrichment over the input control samples. ChIP enrichment of each peak was calculated as  $e = \log_2\left(\frac{n_{fg}}{N_{fg} * \min(N_{fg}, N_{bg}) + p} / \frac{n_{bg}}{N_{bg} * \min(N_{fg}, N_{bg}) + p}\right)$ , where  $n_{fg}$  and  $n_{bg}$  are the summed weights of overlapping foreground and background (input chromatin) read alignments, respectively.  $N_{fg}$  and  $N_{bg}$  are the total number of aligned reads in foreground and background samples, and  $p$  is a pseudo-count constant ( $p=8$ ) used to minimize the sampling noise for peaks with very low counts. The read counts in the peaks called on the pooled samples were then re-quantified separately on the two replicates. As an indication of the high reproducibility of the inferred maps of HAND2-binding sites,



the log<sub>2</sub>-transformed counts showed a Pearson's correlation coefficient of 0.63 between replicates. The fraction of reads under the peaks (FRiP) (Landt et al., 2012) for the two independent ChIP-Seq samples was 3.15% and 6.66%, respectively. This is well above of the value of FRiP that was considered as acceptable (1%) by the ENCODE consortium (Landt et al., 2012), which underscores the high signal-to-noise ratio in both ChIP-Seq samples. HAND2-interacting genomic regions were associated to their neighboring genes using the “basal plus extension” domain ( $\leq 1\text{Mb}$ ) from GREAT version 3.0.0 (McLean et al., 2010).

### **Functional enrichment analysis**

The 12117 HAND2-enriched peaks identified by ChIP-Seq were sorted by the combined enrichment values over the two replicates and split into deciles. GREAT was then run on the first deciles, the pool of the first two deciles and so on by incrementally pooling the subsequent deciles up to reconstituting the complete list of HAND2 peaks. The terms for mouse phenotypes from MGI (Bult et al., 2008) and the Gene Ontology (GO) terms for biological processes were used (Ashburner et al., 2000). Specific heart-related terms were manually extracted (using the following keywords/patterns: heart, card-, ventric-, cushion, atria, atrium, atrioventricular, septum, trabec-, endoc-, myoc-, coronary, outflow, valve, tricuspid, conduction) and those showing statistically significant enrichment were retained. In order to be considered, each term must show a FDR  $\leq 1\text{e-}5$  (hyper-geometric test) in at least two out of the ten incremental bins considered. FDRs were log<sub>10</sub>-transformed and their sign inverted. These numbers were then hierarchically clustered (Euclidean distance, complete linkage); the dendrogram was finally re-ordered according to the mean of these values across the ten bins using the reorder function of R. Fig 1C shows the 16 highest enriched GO terms from the whole cistrome, but the direct ontological child

term of some of these terms are not shown due to redundant annotations between development-related terms and their direct morphogenesis-related child terms.

### **Analysis of Evolutionary Conservation**

To calculate the evolutionary conservation of HAND2-interacting genomic regions, the average PhastCons conservation score for a subset of 11 species (euarchontoglires) was calculated for each base within the  $\pm 1500$ bp surrounding each peak summit.

### ***De novo* motif discovery**

The findMotifsGenome.pl script in the HOMER collection (Heinz et al., 2010) was used to perform: 1. over-representation analysis of known TF-binding sites and 2. *de novo* motif discovery using a fixed length of 7 nucleotides. The region  $\pm 150$  bps surrounding the summit of each peak was considered. The 20 most over-represented matrices for the top 5 motifs highlighted by *de novo* motif discovery were then used to scan the region for high-affinity matches using FIMO (Grant et al., 2011). The p-value threshold to report a hit was set to  $1e-4$ . Only the matrices obtained from mammalian datasets and showing at least one high-affinity match across the HAND2 ChIP-Seq peaks were retained. The resulting list of matches was transformed to a matrix with the motifs on the rows and the regions on the columns. P-values were  $\log_{10}$ -transformed and their sign inverted, then hierarchically clustered (Euclidean distance, complete linkage).

### **Hierarchical clustering, plotting and statistical testing**

Clustering, plots and statistics were performed using R.

## ChIP-qPCR analysis

All genomic regions analyzed in more detail were verified by ChIP-qPCR using embryonic hearts (*Hand2*<sup>3xF/3xF</sup>) at E9.25-E9.5 (n=2 biological replicates) and E10.5 (n=3 biological replicates). An unlinked amplicon targeting the *Actb* locus was used as normalizing control and to calculate the fold-enrichment. To prevent artefactual bias of fold enrichments, a cycle threshold of 32 was defined as background. For each experiment, two genomic regions not enriched in the HAND2 ChIP-Seq dataset were used as negative controls. The oligos used for qPCR amplification are listed here.

| ChIP Amplicon               | Forward primer              | Reverse primer              |
|-----------------------------|-----------------------------|-----------------------------|
| <i>Actb</i> +1.8kb control  | 5'GATCTGAGACATGCAAGGAGTG3'  | 5'GGCCTTGGAGTGTGTATTGAG3'   |
| NEG 1<br><i>Snail</i> +64kb | 5'CCACCTGTCTGCCCTTAGTC3'    | 5'GGGCTTCTTGAACCTACC3'      |
| NEG 2<br><i>Furin</i> -50kb | 5'CTACATGAGGGTTGGGGAGA-3'   | 5'TGCTCTGCTGATGGCTAAAA3'    |
| <i>Gata4</i> -124kb         | 5'CTTCTCGAAGGCAGCAGTCT-3'   | 5'GGACTGATGAGGTGGAAGGA3'    |
| <i>Myocd</i> +60kb          | 5'TGGCTATTGTCCCTCCAGAC-3'   | 5'GGATGATGTCAGGGCTTCTC3'    |
| <i>Gata6</i> +320kb         | 5'GACGTTATCAAAGCTCCACATTC3' | 5'AAAAGTCAGCTGTAAGCTCTTGG3' |
| <i>Tbx20</i> -114kb         | 5'AGCCCTGGGTCTCTTCACTT3'    | 5'TGAGAGAAAGCAGAGCGGAG3'    |
| <i>Wnt11</i> +206kb         | 5'TTTTGGTATGAAGGACACGGA3'   | 5'CACAAGCGTTTGCTTAGATAACT3' |
| <i>Wnt5a</i> -378kb         | 5'GAAAGAGTGGATGTGTGTGTGAG3' | 5'AGGCCCACTTCTCTGGTTAAT3'   |
| <i>Bmp4</i> -272kb          | 5'AAGCCACCCCACTGGTATTC3'    | 5'TAGTTCCTTGCACAGCAGG3'     |
| <i>Tgfb2</i> +482kb         | 5'CCATCACAGGAGTGAATGA3'     | 5'ACTTGACCTCTGCCATCTGC3'    |
| <i>Fgf10</i> -231kb         | 5'AATCCCCCTTCCGATCTGTC3'    | 5'ACTGGCTTCATGTCTTCCCA3'    |
| <i>Has2</i> -26kb           | 5'ATCCGTTGTGAAGCACTTGAG3'   | 5'GTCGCTTCACTTCATTGCTTC3'   |
| <i>Snail</i> +14kb          | 5'GCTTTGCCTGTTCAGGACAT3'    | 5'GAAAGCACGGCCTATGAGAA3'    |
| <i>Snail</i> +45kb          | 5'ACTCTCCGGGACAGCTAATA3'    | 5'CCCACTGCTTTGATCAGCTT3'    |
| <i>Snail</i> +57kb          | 5'TCTGCTGGCTCCAGATGT3'      | 5'TTGATAAAGCCCTCTGTGC3'     |
| <i>Hand2</i> +12kb          | 5'TCGCTTAGTCGCCTTCTCAT3'    | 5'GTTCTTTGCCCCAGATTTCC3'    |
| <i>Twist1</i> +10kb         | 5'CCTCTGGTTGACACAAAGCA3'    | 5'TGGGGACTAGGACACCAGAC3'    |
| <i>Msx1</i> -69kb           | 5'AATTCAGCGCTTGAACGTCT3'    | 5'CCACTTAGCAAACCGCAAAT3'    |
| <i>Sox9</i> +196kb          | 5'GATGGCTGGAACCACTGTCT3'    | 5'GGGGAGTGGGGTTATTTAGC3'    |
| <i>Hnrnapab</i> +85kb       | 5'CCTCGCTGGTTGACTTTGAG3'    | 5'TGTCAGGATGTGCATGTGTG3'    |
| <i>Glipr2</i> -26kb         | 5'ACAGGGCCTAAAGCATCAAC3'    | 5'CCGTCTTGTCTCTGTGTGGA3'    |
| <i>Pitx2</i> +585kb         | 5'ACAAATGCCAGCCTCAGAAC3'    | 5'GATTTGCATCTCCTGCCCTA3'    |
| <i>Vasn</i> +792kb          | 5'ACCTCCAATGATTCCTACTGC3'   | 5'GAGCCACAGATTGTCACAGC3'    |
| <i>Kdr</i> -30kb            | 5'ATCTAGCCCTCCCCAACCTA3'    | 5'TGACCTGGCTTTGTGAGTTG3'    |
| <i>Gja5</i> +31kb           | 5'TCAAAGGAAACACCTCTGG3'     | 5'GGACAGATTGGCAGGGTCTA3'    |
| <i>Hey1</i> -45kb           | 5'AGGTGGATCAGATGGACAGC3'    | 5'GGAAAGCCTTGTGGACTCTG3'    |

|                     |                          |                           |
|---------------------|--------------------------|---------------------------|
| <i>Tmem100+99kb</i> | 5'AGGTCGTTCTCTCGTGCATT3' | 5'AGCTCCTTGACAACCTCCAA3'  |
| <i>Cyr61 +6.8kb</i> | 5'TCCAAGAGCAATGTGACACC3' | 5'GGAGTTTTGGGTGTGGTTA3'   |
| <i>Hhex +9kb</i>    | 5'CAGCCACTGTGAGGTTTTCA3' | 5'ATGGCCTCCTCCTTCTCCTA3'  |
| <i>ErbB4 +345kb</i> | 5'GCTCAGACCAATGGTTCGTT3' | 5'ACACAACCTGCGGATGTCAAG3' |
| <i>Tll1 -14kb</i>   | 5'GGTGAGGAATGCAATGGACT3' | 5'TAAATCCCAGTGGTCTGTTCC3' |
| <i>Acvr11 +35kb</i> | 5'CTCCAAATGGCGAACTTGAT3' | 5'ACCATGGCAGATGTCACTCA3'  |

## Transcriptome analysis

AVCs dissected from wild-type and *Hand2*<sup>ΔΔ</sup> mouse embryos at E9.0-9.25 (18-23 somites) were flash frozen in RLT buffer (Qiagen). Four AVCs per replicate were pooled keeping the same gender and age ratio for all replicates. RNA was extracted using the QIAGEN RNeasy mini kit. The quality of total RNA (30-60ng) was analyzed using the Agilent 2100 Bioanalyzer. Only samples with a RIN  $\geq 8.5$  were used for library construction using the Clontech SMARTer kit and sequenced on Illumina HiSeq 3000 using a single-read 50-cycles protocol.

Single-end reads were aligned to the mm9 reference genome and to the *Mus Musculus* transcriptome (iGenome refGene GTF) using TopHat v2.0.13 (Kim et al., 2013). The parameters were left to default, except for using the option *--no-coverage-search*. Profiles for the UCSC genome browser (Fujita et al., 2011) were generated considering just reads with a unique mapping position on the genome. These reads were fished out from the bam files using the option *-q 1* of SAMtools (Li et al., 2009). Profiles were obtained using *genomeCoverageBed* from BedTools v2.17.0 and linearly re-scaled according to sequencing depth (RPM, Reads Per Million sequenced reads; (Quinlan and Hall, 2010). Gene-wise counts were calculated using *htseq-count* from the HTSeq package with *-s* set to *no* (Anders et al., 2015). Only uniquely mapped reads were considered. *edgeR* was used to assess differential expression (Robinson et al., 2010). Libraries were normalized according to TMM normalization. Tag-wise estimation of dispersion was evaluated using *prior.df=10*. Only those genes

showing expression ( $\text{RPM} \geq 1$ ) in at least three samples were considered for the differential analysis. This was evaluated using the *exactTest* function in R. False discovery rates were estimated using the Benjamini-Hochberg correction. Differentially expressed genes (DEGs) were defined as those showing a  $q$ -value  $\leq 0.05$  and a linear fold-change  $\geq 1.5$ . R was used to run *edgeR* and to generate heat maps.

### Functional annotation of differentially expressed genes (DEGs)

Functional enrichments were calculated using DAVID 6.8 and MouseMine; the latter was applied to specifically evaluate the enrichment in annotated mouse phenotypes (Huang da et al., 2009; Motenko et al., 2015). Lists of *Epithelial-to-Mesenchymal Transition* (EMT) and *Atrio-Ventricular Canal cushions morphogenesis* (AVC) were retrieved as follows. Genes annotated as GO:0001837 or GO:0010717 in AMIGO, were considered as involved in EMT (Carbon et al., 2009). Genes annotated as MP:0000297 (and children terms) in the MGI were considered as involved in AVC (Blake et al., 2017). These lists were retrieved from the indicated websites on January 23, 2017. HAND2-target genes associations were defined by GREAT v3.0.0, which was run with default parameters (McLean et al., 2010). EMT- and AVC-specific sets of HAND2-target genes were obtained by intersecting these lists with the DEGs and the annotations described in this paragraph.

### Genomic regions used for generating *LacZ* reporter transgenic mouse embryos

| CRM                   | ChIP-Seq peaks (NCBI37/mm9)  | Region tested for <i>LacZ</i> activity (NCBI37/mm9) | Forward / Reverse primers    | Size (bp) |
|-----------------------|------------------------------|-----------------------------------------------------|------------------------------|-----------|
| <i>Snail</i><br>+14kb | chr2:167,376,621-167,379,511 | chr2:167376492-167379526                            | 5'-GGGAGACTGACGCAAGAGAC-3'   | 3035      |
|                       |                              |                                                     | 5'-CAAAGGTGGAGGGATCAAGA-3'   |           |
| <i>Snail</i><br>+45kb | *                            | chr2:167,408,344-167,409,540                        | 5'-CGATGTTCTGAGAGCATCTTGA-3' | 1197      |
|                       |                              |                                                     | 5'-CCCCATTCTGTCTAACTGCAA-3'  |           |

|                       |                                  |                                  |                                                        |      |
|-----------------------|----------------------------------|----------------------------------|--------------------------------------------------------|------|
| <i>Snail</i><br>+57kb | chr2:167,418,460-<br>167,423,821 | chr2:167,419,933-<br>167,424,557 | isolated from BAC RP23-193B17 as<br>HpaI/MfeI fragment | 4625 |
|-----------------------|----------------------------------|----------------------------------|--------------------------------------------------------|------|

\*the *Snail*+45kb peak was not called by MACS, but its significant enrichment in HAND2 chromatin complexes isolated from mouse embryonic hearts at E9.5 was established by ChIP-qPCR analysis (Figure S6A).

### ***In situ* hybridization probes**

The following probes were kind gifts from A. Nieto: *Snail*; J. Martin: *Has2* and *Tgfb $\beta$ 2*; S. Evans: *Wnt11*; A. Kispert: *Gata4* and *Hey2*; M. Parmacek: *Myocd* and S. Arnold and S. Probst: *Hhex*. All other probes were generated by RT-PCR amplification of published fragments that were cloned into the appropriate vectors encoding Sp6 and T7 RNA polymerase binding sites to generate antisense riboprobes.

### **Immunohistochemistry**

Embryos were collected and fixed in 4% PFA overnight at 4°C prior to embedding in paraffin. Sections were rehydrated and antigens retrieved by heating them for 5 min at 120°C in 10mM Sodium Citrate (pH 6.0) containing 0.05% Tween-20. Sections were incubated overnight at 4°C with primary antibodies detecting the following epitopes: FLAG (M2; 1:500; Sigma F1804), KI67 (1:200; Millipore ab9260), SMA-Cy3 (1:250; Sigma C6198), SOX9 (1:5000, Millipore ab5535). Alternatively, embryos were fixed in 4% PFA for 2hrs at 4°C, embedded in a 1:1 mixture of 30% Sucrose and OCT and frozen at -80°C. Cryosections were used in combination with the following primary antibody: PECAM-647 (1:200; Biolegend 102515). Sections were incubated with either goat anti-mouse (FLAG), goat anti-rabbit (KI67) secondary antibodies conjugated to Alexa Fluor 488 or 594 (1:1000, Life Technologies) for 1 hour at room temperature. For detecting two antigens simultaneously, the anti-FLAG M2 antibody was directly labeled using the APEX™ Alexa Fluor® 488 Antibody Labeling Kit (Life Technologies). Immunostaining was performed as follows:

overnight incubation with mouse primary antibody (anti-TWIST1: 1:500, Santa Cruz sc81417) was followed by a one-hour incubation with goat anti-mouse Alexa 594. Then sections were incubated again overnight with Alexa 488-labelled anti-FLAG M2. The next day, they were incubated for 1 hour with rabbit anti-Alexa488 and finally for 1 hour with goat anti-rabbit Alexa 488 to enhance the signal. Nuclei were counterstained with Hoechst-33258. Images were acquired using a Leica SP5 confocal microscope.

### **AVC explant cultures**

The matrix for AVC explant cultures (Luna-Zurita et al., 2010) was prepared by distributing a 1.5mg/ml solution of rat-tail collagen-type I in M199 medium (Life Technologies) in 24-well plates. This matrix was allowed to solidify for 1hr at 37°C in 5%CO<sub>2</sub>. Following 4-5 washes in M199 medium (30min each), the collagen matrixes were incubated for  $\geq$ 1hr in M199 medium supplemented with 1% FBS, 1% L-Glutamine, 0.1% insulin-transferrin-selenium (ITS, Life Technologies) and antibiotics. AVC explants from E9.5 embryonic hearts were carefully dissected in ice-cold PBS, cut open and placed with the endocardium facing down onto the collagen matrixes after removing the excess medium. Following placement, the explants were left to attach for 4-5hrs at 37°C in 5%CO<sub>2</sub>. Complete M199 medium (150 $\mu$ l/well) was added and explants were cultured for 3 days.

## Supplemental References

Anders, S., Pyl, P.T., and Huber, W. (2015). HTSeq-a Python framework to work with high-throughput sequencing data. *Bioinformatics* 31, 166-169.

Ashburner, M., Ball, C.A., Blake, J.A., Botstein, D., Butler, H., Cherry, J.M., Davis, A.P., Dolinski, K., Dwight, S.S., Eppig, J.T., *et al.* (2000). Gene ontology: tool for the unification of biology. The Gene Ontology Consortium. *Nat Genet* 25, 25-29.

Barnes, R.M., Firulli, B.A., VanDusen, N.J., Morikawa, Y., Conway, S.J., Cserjesi, P., Vincentz, J.W., and Firulli, A.B. (2011). Hand2 loss-of-function in Hand1-expressing cells reveals distinct roles in epicardial and coronary vessel development. *Circ Res* 108, 940-949.

Blake, J.A., Eppig, J.T., Kadin, J.A., Richardson, J.E., Smith, C.L., Bult, C.J., and the Mouse Genome Database, G. (2017). Mouse Genome Database (MGD)-2017: community knowledge resource for the laboratory mouse. *Nucleic Acids Res* 45, D723-D729.

Bruneau, B.G., Bao, Z.Z., Tanaka, M., Schott, J.J., Izumo, S., Cepko, C.L., Seidman, J.G., and Seidman, C.E. (2000). Cardiac expression of the ventricle-specific homeobox gene *Irx4* is modulated by *Nkx2-5* and *dHand*. *Dev Biol* 217, 266-277.

Bult, C.J., Eppig, J.T., Kadin, J.A., Richardson, J.E., Blake, J.A., and Mouse Genome Database, G. (2008). The Mouse Genome Database (MGD): mouse biology and model systems. *Nucleic Acids Res* 36, D724-728.

Carbon, S., Ireland, A., Mungall, C.J., Shu, S., Marshall, B., Lewis, S., Ami, G.O.H., and Web Presence Working, G. (2009). AmiGO: online access to ontology and annotation data. *Bioinformatics* 25, 288-289.

Fujita, P.A., Rhead, B., Zweig, A.S., Hinrichs, A.S., Karolchik, D., Cline, M.S., Goldman, M., Barber, G.P., Clawson, H., Coelho, A., *et al.* (2011). The UCSC Genome Browser database: update 2011. *Nucleic Acids Res* 39, D876-882.



- Gaidatzis, D., Lerch, A., Hahne, F., and Stadler, M.B. (2015). QuasR: quantification and annotation of short reads in R. *Bioinformatics* *31*, 1130-1132.
- Grant, C.E., Bailey, T.L., and Noble, W.S. (2011). FIMO: scanning for occurrences of a given motif. *Bioinformatics* *27*, 1017-1018.
- Heinz, S., Benner, C., Spann, N., Bertolino, E., Lin, Y.C., Laslo, P., Cheng, J.X., Murre, C., Singh, H., and Glass, C.K. (2010). Simple combinations of lineage-determining transcription factors prime cis-regulatory elements required for macrophage and B cell identities. *Mol Cell* *38*, 576-589.
- Holler, K.L., Hendershot, T.J., Troy, S.E., Vincentz, J.W., Firulli, A.B., and Howard, M.J. (2010). Targeted deletion of *Hand2* in cardiac neural crest-derived cells influences cardiac gene expression and outflow tract development. *Dev Biol* *341*, 291-304.
- Huang da, W., Sherman, B.T., and Lempicki, R.A. (2009). Systematic and integrative analysis of large gene lists using DAVID bioinformatics resources. *Nat Protoc* *4*, 44-57.
- Kim, D., Pertea, G., Trapnell, C., Pimentel, H., Kelley, R., and Salzberg, S.L. (2013). TopHat2: accurate alignment of transcriptomes in the presence of insertions, deletions and gene fusions. *Genome Biol* *14*, R36.
- Landt, S.G., Marinov, G.K., Kundaje, A., Kheradpour, P., Pauli, F., Batzoglou, S., Bernstein, B.E., Bickel, P., Brown, J.B., Cayting, P., *et al.* (2012). ChIP-seq guidelines and practices of the ENCODE and modENCODE consortia. *Genome Res* *22*, 1813-1831.
- Li, H., Handsaker, B., Wysoker, A., Fennell, T., Ruan, J., Homer, N., Marth, G., Abecasis, G., Durbin, R., and Genome Project Data Processing, S. (2009). The Sequence Alignment/Map format and SAMtools. *Bioinformatics* *25*, 2078-2079.

Luna-Zurita, L., Prados, B., Grego-Bessa, J., Luxan, G., del Monte, G., Benguria, A., Adams, R.H., Perez-Pomares, J.M., and de la Pompa, J.L. (2010). Integration of a Notch-dependent mesenchymal gene program and Bmp2-driven cell invasiveness regulates murine cardiac valve formation. *J Clin Invest* *120*, 3493-3507.

McFadden, D.G., Barbosa, A.C., Richardson, J.A., Schneider, M.D., Srivastava, D., and Olson, E.N. (2005). The Hand1 and Hand2 transcription factors regulate expansion of the embryonic cardiac ventricles in a gene dosage-dependent manner. *Development* *132*, 189-201.

McLean, C.Y., Bristor, D., Hiller, M., Clarke, S.L., Schaar, B.T., Lowe, C.B., Wenger, A.M., and Bejerano, G. (2010). GREAT improves functional interpretation of cis-regulatory regions. *Nat Biotechnol* *28*, 495-501.

Morikawa, Y., and Cserjesi, P. (2008). Cardiac neural crest expression of Hand2 regulates outflow and second heart field development. *Circ Res* *103*, 1422-1429.

Motenko, H., Neuhauser, S.B., O'Keefe, M., and Richardson, J.E. (2015). MouseMine: a new data warehouse for MGI. *Mamm Genome* *26*, 325-330.

Quinlan, A.R., and Hall, I.M. (2010). BEDTools: a flexible suite of utilities for comparing genomic features. *Bioinformatics* *26*, 841-842.

Robinson, M.D., McCarthy, D.J., and Smyth, G.K. (2010). edgeR: a Bioconductor package for differential expression analysis of digital gene expression data. *Bioinformatics* *26*, 139-140.

Srivastava, D., Thomas, T., Lin, Q., Kirby, M., Brown, D., and Olson, E. (1997). Regulation of cardiac mesodermal and neural crest development by the bHLH transcription factor, dHAND. *Nat Genet* *16*, 154-160.

Tsuchihashi, T., Maeda, J., Shin, C.H., Ivey, K.N., Black, B.L., Olson, E.N., Yamagishi, H., and Srivastava, D. (2011). Hand2 function in second heart field progenitors is essential for cardiogenesis. *Dev Biol* *351*, 62-69.

Visel, A., Minovitsky, S., Dubchak, I., and Pennacchio, L.A. (2007). VISTA Enhancer Browser--a database of tissue-specific human enhancers. *Nucleic Acids Res* 35, D88-92.

VanDusen, N.J., Casanovas, J., Vincentz, J.W., Firulli, B.A., Osterwalder, M., Lopez-Rios, J., Zeller, R., Zhou, B., Grego-Bessa, J., De La Pompa, J.L., *et al.* (2014). Hand2 is an essential regulator for two Notch-dependent functions within the embryonic endocardium. *Cell Rep* 9, 2071-2083.

Zhang, Y., Liu, T., Meyer, C.A., Eeckhoute, J., Johnson, D.S., Bernstein, B.E., Nusbaum, C., Myers, R.M., Brown, M., Li, W., *et al.* (2008). Model-based analysis of ChIP-Seq (MACS). *Genome Biol* 9, R137.
